# Supplementary material
Source: HighWire-hosted journal article supplement (https://www.cmaj.ca/highwire/filestream/57981/field_highwire_adjunct_files/2/in-singh-appendix_3.pdf)
Supplement: in-singh-appendix_3.pdf [file in-singh-appendix_3.pdf]

### Appendix 3: Characteristics of air-medical transports stratified by diagnostic category (N = 18 001\*)

| Factor                                   | Respiratory<br>n = 1294 | Cardiovascular<br>n = 5937 | Neurologic<br>n = 2496 | Trauma<br>n = 1741 | Obstetric<br>n = 1302 | Surgical<br>n = 1806 | Other medical<br>n = 3425 |
|------------------------------------------|-------------------------|----------------------------|------------------------|--------------------|-----------------------|----------------------|---------------------------|
| <b>Patient</b>                           |                         |                            |                        |                    |                       |                      |                           |
| Age, yr, median (IQR)                    | 62 (47–74)              | 62 (52–73)                 | 51 (34–67)             | 40 (27–32)         | 26 (22–32)            | 52 (35–68)           | 45 (29–63)                |
| Female sex, %                            | 44.5                    | 35.4                       | 41.5                   | 30.7               | 100.0                 | 53.7                 | 46.7                      |
| Hemodynamic instability at baseline, %   | 8.1                     | 4.2                        | 2.0                    | 3.0                | 0.7                   | 4.1                  | 3.1                       |
| Assisted ventilation before transport, % | 25.4                    | 6.0                        | 23.3                   | 10.3               | –†                    | 4.8                  | 8.1                       |
| <b>Transport</b>                         |                         |                            |                        |                    |                       |                      |                           |
| Distance, km, median (IQR)               | 181 (88–346)            | 202 (110–330)              | 180 (97–314)           | 190 (98–375)       | 272 (178–375)         | 239 (136–366)        | 223 (129–366)             |
| Duration, min, median (IQR)              | 60 (36–88)              | 65 (45–100)                | 53 (33–78)             | 45 (30–69)         | 73 (51–97)            | 62 (40–87)           | 51 (30–78)                |
| Helicopter transport, %                  | 53.1                    | 48.0                       | 64.9                   | 70.4               | 43.2                  | 46.7                 | 58.5                      |
| Critical care paramedic crew, %          | 58.9                    | 60.5                       | 61.5                   | 67.0               | 48.2                  | 43.0                 | 43.4                      |
| <b>Contextual</b>                        |                         |                            |                        |                    |                       |                      |                           |
| Type of sending facility, %              |                         |                            |                        |                    |                       |                      |                           |
| Acute care hospital                      | 63.0                    | 78.3                       | 67.9                   | 51.9               | 64.9                  | 59.6                 | 52.3                      |
| Non-acute care facility                  | 17.5                    | 8.2                        | 9.4                    | 10.2               | 24.5                  | 23.3                 | 19.8                      |
| On-scene call                            | 11.6                    | 9.2                        | 16.3                   | 28.8               | 3.5                   | 9.5                  | 18.2                      |
| Rural sending site, %                    | 47.4                    | 34.5                       | 39.5                   | 38.9               | 63.1                  | 65.8                 | 51.3                      |
| Night transport, %                       | 38.5                    | 33.0                       | 41.3                   | 38.8               | 46.1                  | 36.9                 | 38.8                      |
| Weekend transport, %                     | 29.1                    | 27.0                       | 30.0                   | 32.7               | 27.6                  | 27.1                 | 29.2                      |
|                                          |                         |                            |                        |                    |                       |                      |                           |
| <b>Critical events, %</b>                | 6.8                     | 6.0                        | 4.7                    | 5.9                | 2.5                   | 4.6                  | 4.4                       |

\*Diagnostic information was available for 18 001 (93.6%) of the 19 228 transports.

†Cells with 5 or fewer observations (or equivalent proportions) have been masked in accordance with the privacy regulations of the Institute for Clinical Evaluative Sciences.
